# Supplementary material
Source: PubMed Central journal article supplement (PMC5712444)
Supplement: NIHMS921074-supplement-Supplementary_Data.pdf [file NIHMS921074-supplement-Supplementary_Data.pdf]

**Supplementary Table 1: Sensitivity analysis comparing untested and HIV-uninfected population in children < 5 years of age at 6 sentinel sites in South Africa, 2009 –2013**

| Characteristic                                 | HIV-uninfected<br>(n=1,557) | HIV untested<br>(n=765) | p-value |
|------------------------------------------------|-----------------------------|-------------------------|---------|
| <b>Demographics</b>                            |                             |                         |         |
| Age, months; median (IQR)                      | 4.9<br>(2.4 – 11.3)         | 5.4<br>(2.2 – 13.0)     | 0.15    |
| Female sex                                     | 667/1,557<br>(42.8)         | 336/765<br>(43.9)       | 0.62    |
| Race, black (%)                                | 1,537/1,557<br>(98.7)       | 739/761<br>(97.1)       | 0.006   |
| Duration of Symptoms; median (days, IQR)       | 2<br>(1 – 3)                | 2<br>(1 – 3)            | 0.70    |
| Premature                                      | 26/1,556<br>(1.7)           | 11/760<br>(1.5)         | 0.69    |
| DOB within 10 weeks of start of RSV season (%) | 793/1,557<br>(50.9)         | 418/765<br>(54.6)       | 0.09    |
| RSV CT Value; mean (SD)                        | 25.7<br>(4.6)               | 25.1<br>(5.1)           | 0.003   |
| Crowding (5+ people in the household)          | 140/1,534<br>(9.1)          | 86/758<br>(11.4)        | 0.09    |
| <b>Underlying Conditions</b>                   |                             |                         |         |
| Underlying illness                             | 56/1,557<br>(3.6)           | 16/762<br>(2.1)         | 0.05    |
| Whole blood PCR+ S. Pneumo (%)                 | 62/1,134<br>(5.5)           | 4/147<br>(2.7)          | 0.16    |
| <b>Outcomes</b>                                |                             |                         |         |
| Primary Outcome (%)                            | 27/1,540<br>(1.8)           | 11/737<br>(1.5)         | 0.65    |
| Secondary Outcome (%)                          | 555/1538<br>(36.1)          | 212/753<br>(28.2)       | <0.001  |

A sensitivity analysis was performed to compare HIV-uninfected children with HIV-unttested children. Abbreviations: HIV: human immunodeficiency virus.

**Supplementary Table 2: RSV coinfection matrix of viral coinfections in RSV-infected HIV-uninfected children aged <5 years at 6 sentinel sites in South Africa, 2009 –2013**

|                | RV<br>N (%)                | HMPV<br>N (%) | AdV<br>N (%)  | EV<br>N (%)  | Infl<br>N (%) | PIV1<br>N (%) | PIV2<br>N (%) | PIV 3<br>N (%) |
|----------------|----------------------------|---------------|---------------|--------------|---------------|---------------|---------------|----------------|
| RV             | 438 <sup>a</sup><br>(18.9) |               |               |              |               |               |               |                |
| HMPV           | 10 <sup>b</sup>            | 9<br>(0.39)   |               |              |               |               |               |                |
| ADV            | 117                        | 5             | 159<br>(6.8)  |              |               |               |               |                |
| EV             | 0                          | 1             | 47            | 134<br>(5.8) |               |               |               |                |
| Infl           | 7                          | 1             | 8             | 3            | 10<br>(0.43)  |               |               |                |
| PIV1           | 2                          | 0             | 4             | 2            | 0             | 4<br>(0.17)   |               |                |
| PIV2           | 5                          | 0             | 3             | 2            | 0             | 0             | 2<br>(0.09)   |                |
| PIV3           | 6                          | 0             | 4             | 2            | 1             | 0             | 0             | 7<br>(0.30)    |
| Total positive | 575<br>(24.5) <sup>c</sup> | 26<br>(1.1)   | 347<br>(14.9) | 191<br>(8.2) | 30<br>(1.3)   | 12<br>(0.52)  | 12<br>(0.52)  | 20<br>(0.86)   |

a: Exclusive dual infection only, this cell shows RSV-RV positive children.b: This cell shows detection of both RV and HMPV in the RSV-positive population.

c: In this cell total prevalence of rhinovirus-positive children in the population of RSV-positive children; this row shows total prevalence of the virus in the RSV-positive population including all permutations of coinfection. All percentages are given out of the total RSV-positive population of 2,322 children.

Abbreviations: RSV: Respiratory Syncytial Virus, HMPV: human metapneumovirus; RV: rhinovirus; ADV: adenovirus; EV: enterovirus; Infl: influenza; PIV1: parainfluenza type 1; PIV2: parainfluenza type 2; PIV-3: parainfluenza 3.

**Supplementary Table 3: Univariate analysis for predictors of disease severity amongst patients with RSV in HIV-uninfected children < 5 years of age at 6 sentinel sites in South Africa, 2009 - 2013**

| Predictor                                                 | Life-threatening disease | p-value            | Life-threatening disease, or LOS 5+ days | p-value              |
|-----------------------------------------------------------|--------------------------|--------------------|------------------------------------------|----------------------|
| Age in months<br>OR (95% CI)                              | 0.94<br>(0.89–0.99)      | 0.03 <sup>Ψ</sup>  | 0.94<br>(0.92–0.95)                      | <0.0001 <sup>Ψ</sup> |
| Sex<br>OR (95% CI)                                        | 0.84<br>(0.44–1.6)       | 0.60               | 1.1<br>(0.95–1.3)                        | 0.17 <sup>Ψ</sup>    |
| Symptom Duration<br>OR (95% CI)                           | 0.98<br>(0.78–1.2)       | 0.83               | 1.1<br>(1.0–1.1)                         | 0.07 <sup>Ψ</sup>    |
| Prematurity<br>OR (95% CI)                                | 5.6<br>(1.6–18.9)        | 0.006 <sup>Ψ</sup> | 2.4<br>(1.2–4.6)                         | 0.009 <sup>Ψ</sup>   |
| DOB within 10 weeks of start of RSV season<br>OR (95% CI) | 1.3<br>(0.66–2.4)        | 0.48               | 1.3<br>(1.1–1.5)                         | 0.006 <sup>Ψ</sup>   |
| RSV Ct value<br>OR (95% CI)                               | 1.0<br>(0.93–1.1)        | 1.0                | 0.98<br>(0.97–1.0)                       | 0.09 <sup>Ψ</sup>    |
| Crowding<br>OR (95% CI)                                   | 0.51<br>(0.12–2.1)       | 0.36               | 1.2<br>(0.93–1.6)                        | 0.14 <sup>Ψ</sup>    |
| Underlying Illness<br>OR (95% CI)                         | 2.8<br>(0.85–9.4)        | 0.09 <sup>Ψ</sup>  | 1.6<br>(0.99–2.6)                        | 0.05                 |

All factors with P<0.20 were entered into the multivariate model using the manual forward stepwise procedure. Only age and prematurity with P<0.05 were used in the final multivariate model. Sex, DOB within 10 weeks of start of RSV season, RSV Ct value and crowding were excluded because P>= 0.20 in univariate analysis for primary outcome and RSV Ct value and underlying illness were excluded for secondary outcome. Abbreviations: MV: mechanical ventilation, ICU: Intensive Care Unit, LOS: length of stay. DOB: Date of birth, RSV: respiratory syncytial virus. Ψ P<0.2.

**Supplementary Table 4: Primary outcome, univariate and multivariate analyses of RSV viral coinfection and life-threatening disease in HIV-infected children < 5 years of age at 6 sentinel sites in South Africa, 2009 – 2013**

| <b>Coinfection</b>     | <b>Life-Threatening Disease</b> | <b>MV, ICU, Death<br/>n/N (%)</b> | <b>OR<br/>(95% CI)</b> | <b>p-value OR</b> |
|------------------------|---------------------------------|-----------------------------------|------------------------|-------------------|
| <b>Any<sup>a</sup></b> | No<br>Yes                       | 36/38 (5.3)<br>3/41 (7.3)         | 1.4<br>(0.22 – 9.0)    | 0.71              |
| <b>HMPV</b>            | No<br>Yes                       | 5/77 (6.5)<br>0/2 (0)             |                        |                   |
| <b>RV</b>              | No<br>Yes                       | 5/65 (7.7)<br>0/14 (0)            |                        |                   |
| <b>ADV</b>             | No<br>Yes                       | 4/62 (6.5)<br>1/17 (5.9)          | 0.9<br>(0.09–8.7)      | 0.93              |
| <b>EV</b>              | No<br>Yes                       | 4/68 (5.9)<br>1/11 (9.1)          | 1.6<br>(0.16–15.8)     | 0.70              |
| <b>Infl</b>            | No<br>Yes                       | 4/76 (5.3)<br>1/3 (33.3)          | 9<br>(0.67–121.5)      | 0.10              |
| <b>PIV2</b>            | No<br>Yes                       | 5/77 (6.5)<br>0/2 (0)             |                        |                   |

No multivariate analysis was done because  $P \geq 0.20$  in univariate analysis for all viral coinfections. PIV1 and PIV 3 were omitted from the table because they were not identified in the HIV-positive population. Outcome data was missing for 3 of 82 HIV-positive children <5 years of age. Abbreviations: MV: mechanical ventilation, ICU: Intensive Care Unit. RSV: Respiratory Syncytial Virus, HMPV: human metapneumovirus; RV: rhinovirus; ADV: adenovirus; EV: enterovirus; Infl: influenza; PIV1: parainfluenza type 1; PIV2: parainfluenza type 2; PIV-3: parainfluenza 3. a: Any viral respiratory coinfection with HMPV, RV, ADV, EV, Infl, PIV1, PIV2, or PIV3.

Supplementary Figure 1: Virus prevalence in the absence or presence of RSV in children < 5 years of age at 6 sentinel sites in South Africa, 2009 - 2013

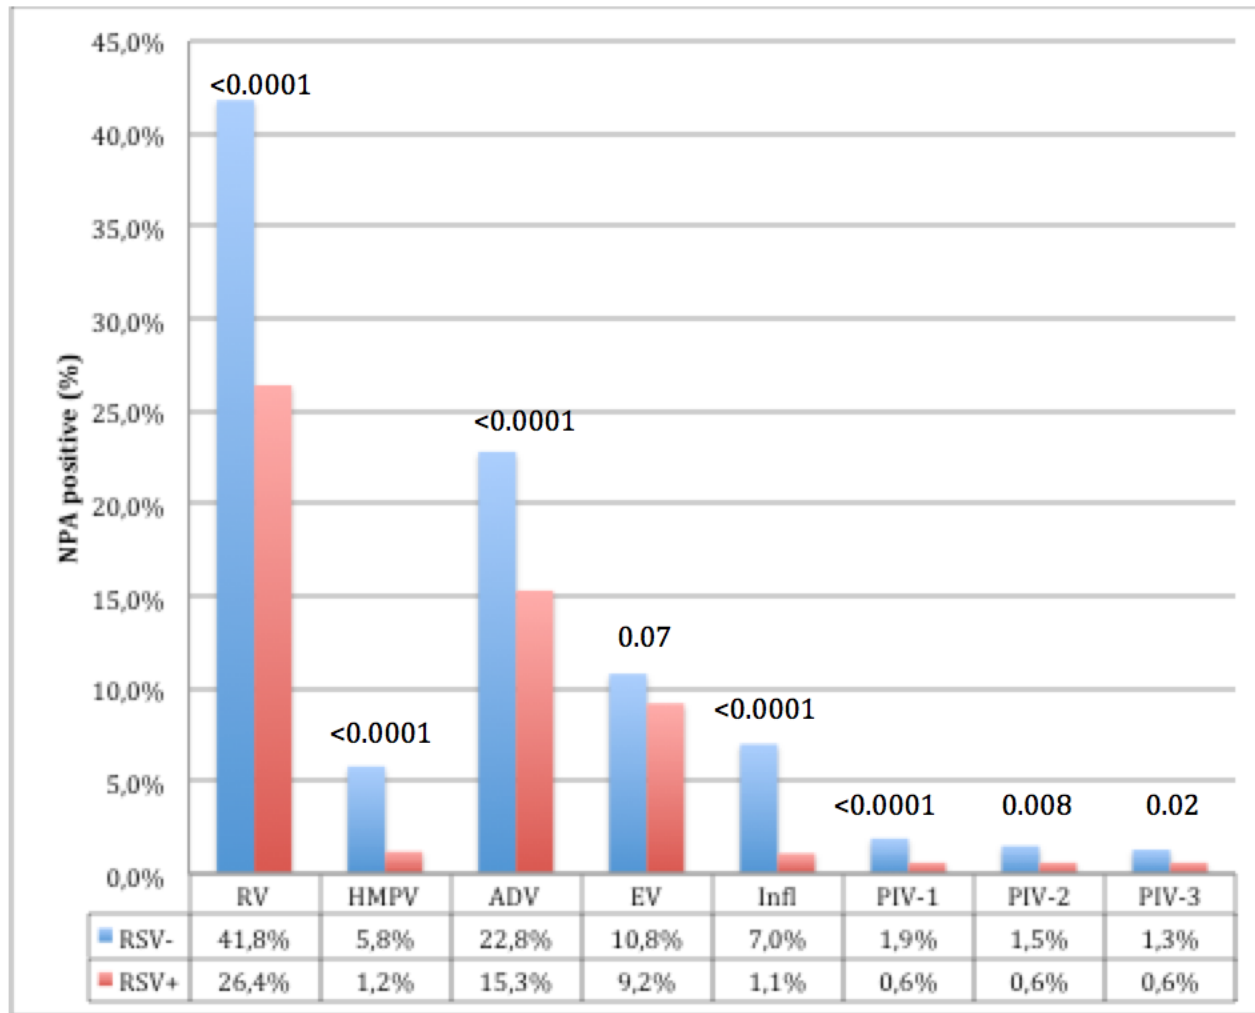

### Supplementary Figure Legend

1. The prevalence of RV, HMPV, ADV, EV, Infl, PIV-1, PIV-2, PIV-3 were measured during the RSV season children with an NPA positive for RSV (RSV+) or negative for RSV (RSV-). Abbreviations: RV: rhinovirus, ADV: adenovirus, EV: enterovirus, Infl: influenza; PIV-1: parainfluenza 1, PIV-2: parainfluenza 2; PIV-3: parainfluenza 3, RSV: Respiratory syncytial virus, NPA: Nasopharyngeal aspirate, +: positive, -: negative.
